# Supplementary material for: Allosteric control of dynamin-related protein 1 through a disordered C-terminal Short Linear Motif
Source: PubMed Central journal article supplement (PMC10761769; doi:10.1038/s41467-023-44413-6), 2024-01-02
Supplement: 41467_2023_44413_MOESM3_ESM.pdf [file 41467_2023_44413_MOESM3_ESM.pdf]

### Description of Additional Supplementary Files

File Name: Supplementary Movie 1

Description: NT constriction upon addition of 0.5  $\mu$ M WT Drp1 in the presence of 1 mM GTP, corresponding to the kymograph in Fig. 4a. RhPE fluorescence is shown. Background was subtracted using background subtraction plugin in ImageJ.

File Name: Supplementary Movie 2

Description: NT constriction and fission upon addition of 0.5  $\mu$ M DCT4 Drp1 in the presence of 1 mM GTP, corresponding to the kymograph in Fig. 4a. RhPE fluorescence is shown. Background was subtracted using background subtraction plugin in ImageJ.

File Name: Supplementary Movie 3

Description: NT constriction and fission upon addition of 0.5  $\mu$ M by DCT6 Drp1 in the presence of 1 mM GTP, corresponding to the kymograph in Fig. 4a. RhPE fluorescence is shown. Background was subtracted using background subtraction plugin in ImageJ.

File Name: Supplementary Movie 4

Description: NT constriction and fission upon addition of 0.5  $\mu$ M CT+ Drp1 in the presence of 1 mM GTP, corresponding to the kymograph in Fig. 4a. RhPE fluorescence is shown. Background was subtracted using background subtraction plugin in ImageJ.

File Name: Supplementary Movie 5

Description: NT constriction and fission upon addition of equimolar concentrations (0.5  $\mu$ M each) of WT Drp1 and GIPC-1, corresponding to the kymograph in Fig. 5e. RhPE fluorescence is shown. Background was subtracted using background subtraction plugin in ImageJ.
